# Supplementary material for: Radiomic feature stability across 4D respiratory phases and its impact on lung tumor prognosis prediction
Source: PubMed Central journal article supplement (PMC6504105; doi:10.1371/journal.pone.0216480), 2019-05-07
Supplement: pone.0216480.s001.pdf [file pone.0216480.s001.pdf]

## Supplementary File 1: List of features in each cluster

### Cluster (Left Red)

wavelet\_LLL\_glszm\_LargeAreaEmphasis  
original\_glcm\_MaximumProbability  
original\_glcm\_JointEnergy  
wavelet\_LLL\_glcm\_MaximumProbability  
wavelet\_HHL\_firstorder\_Maximum  
wavelet\_HHH\_firstorder\_Maximum  
wavelet\_HLL\_gldm\_DependenceVariance  
wavelet\_HLL\_glcm\_MaximumProbability  
wavelet\_HHH\_gIrlm\_ShortRunLowGrayLevelEmphasis  
wavelet\_HHH\_gIrlm\_LongRunLowGrayLevelEmphasis  
wavelet\_HHH\_gldm\_LowGrayLevelEmphasis  
wavelet\_HHH\_gIrlm\_LowGrayLevelRunEmphasis  
wavelet\_HHH\_gIrlm\_LongRunHighGrayLevelEmphasis  
wavelet\_HHH\_gIrlm\_ShortRunHighGrayLevelEmphasis  
wavelet\_HHH\_glcm\_Autocorrelation  
wavelet\_HHH\_gldm\_HighGrayLevelEmphasis  
wavelet\_HHH\_gIrlm\_HighGrayLevelRunEmphasis  
wavelet\_HHH\_gldm\_LargeDependenceLowGrayLevelEmphasis  
wavelet\_HHH\_gldm\_LargeDependenceHighGrayLevelEmphasis  
wavelet\_HHH\_glszm\_HighGrayLevelZoneEmphasis  
wavelet\_LLL\_glszm\_LargeAreaLowGrayLevelEmphasis  
wavelet\_LLL\_gldm\_LargeDependenceLowGrayLevelEmphasis  
wavelet\_LLL\_glszm\_LowGrayLevelZoneEmphasis  
wavelet\_LLL\_gIrlm\_LongRunLowGrayLevelEmphasis  
wavelet\_LLL\_gldm\_LowGrayLevelEmphasis  
wavelet\_LLL\_gIrlm\_ShortRunLowGrayLevelEmphasis  
wavelet\_LLL\_gIrlm\_LowGrayLevelRunEmphasis  
wavelet\_LLL\_gldm\_SmallDependenceLowGrayLevelEmphasis  
wavelet\_LLL\_glszm\_SmallAreaLowGrayLevelEmphasis  
wavelet\_LHH\_ngtdm\_Contrast  
wavelet\_HLH\_glcm\_ClusterProminence  
wavelet\_HHH\_glcm\_ClusterProminence  
wavelet\_HHL\_ngtdm\_Complexity  
wavelet\_HHL\_ngtdm\_Strength  
wavelet\_HHH\_ngtdm\_Strength  
wavelet\_HHH\_ngtdm\_Contrast  
wavelet\_HHH\_ngtdm\_Complexity  
wavelet\_HHH\_ngtdm\_Busyness  
wavelet\_LHL\_glcm\_ClusterProminence  
wavelet\_LHH\_glcm\_ClusterProminence  
wavelet\_LLH\_glszm\_LargeAreaLowGrayLevelEmphasis  
wavelet\_HLH\_gldm\_SmallDependenceHighGrayLevelEmphasis  
wavelet\_HLH\_gldm\_LargeDependenceLowGrayLevelEmphasis

wavelet\_HLH\_glszm\_SmallAreaHighGrayLevelEmphasis  
wavelet\_HLH\_glszm\_HighGrayLevelZoneEmphasis  
wavelet\_HLH\_glrlm\_LongRunHighGrayLevelEmphasis  
wavelet\_HLH\_glcm\_Autocorrelation  
wavelet\_HLH\_glrlm\_ShortRunHighGrayLevelEmphasis  
wavelet\_HLH\_gldm\_HighGrayLevelEmphasis  
wavelet\_HLH\_glrlm\_HighGrayLevelRunEmphasis  
wavelet\_HLL\_gldm\_LargeDependenceHighGrayLevelEmphasis  
wavelet\_HLL\_glszm\_SmallAreaLowGrayLevelEmphasis  
wavelet\_HLL\_gldm\_SmallDependenceLowGrayLevelEmphasis  
wavelet\_HLL\_glszm\_LowGrayLevelZoneEmphasis  
wavelet\_HLL\_glrlm\_LongRunLowGrayLevelEmphasis  
wavelet\_HLL\_glrlm\_ShortRunLowGrayLevelEmphasis  
wavelet\_HLL\_gldm\_LowGrayLevelEmphasis  
wavelet\_HLL\_glrlm\_LowGrayLevelRunEmphasis  
wavelet\_LHH\_glcm\_Correlation  
wavelet\_LHL\_glrlm\_ShortRunHighGrayLevelEmphasis  
wavelet\_LHL\_gldm\_HighGrayLevelEmphasis  
wavelet\_LHL\_glrlm\_HighGrayLevelRunEmphasis  
wavelet\_LHL\_glcm\_Autocorrelation  
wavelet\_LHL\_glrlm\_LongRunHighGrayLevelEmphasis  
wavelet\_LHL\_glszm\_SmallAreaHighGrayLevelEmphasis  
wavelet\_LHL\_gldm\_SmallDependenceHighGrayLevelEmphasis  
wavelet\_LHL\_glszm\_HighGrayLevelZoneEmphasis  
original\_gldm\_SmallDependenceLowGrayLevelEmphasis  
original\_glszm\_LowGrayLevelZoneEmphasis  
original\_glrlm\_LongRunLowGrayLevelEmphasis  
original\_glrlm\_ShortRunLowGrayLevelEmphasis  
original\_gldm\_LowGrayLevelEmphasis  
original\_glrlm\_LowGrayLevelRunEmphasis  
original\_glszm\_ZoneVariance  
original\_glszm\_LargeAreaLowGrayLevelEmphasis  
original\_glszm\_LargeAreaEmphasis  
original\_glszm\_LargeAreaHighGrayLevelEmphasis  
wavelet\_HLL\_glszm\_ZoneVariance  
wavelet\_LHL\_glszm\_ZoneVariance  
wavelet\_LHL\_glszm\_LargeAreaEmphasis  
wavelet\_HHL\_gldm\_SmallDependenceHighGrayLevelEmphasis  
wavelet\_HHL\_glszm\_LargeAreaHighGrayLevelEmphasis  
wavelet\_HHL\_ngtdm\_Busyness  
wavelet\_HHL\_glcm\_Autocorrelation  
wavelet\_HHL\_glrlm\_ShortRunHighGrayLevelEmphasis  
wavelet\_HHL\_gldm\_HighGrayLevelEmphasis  
wavelet\_HHL\_glrlm\_HighGrayLevelRunEmphasis  
wavelet\_HHL\_gldm\_LargeDependenceHighGrayLevelEmphasis

wavelet\_HHL\_gIrlm\_LongRunHighGrayLevelEmphasis  
wavelet\_HHL\_glszm\_SmallAreaHighGrayLevelEmphasis  
wavelet\_HHL\_glszm\_HighGrayLevelZoneEmphasis  
wavelet\_LHH\_gldm\_LargeDependenceHighGrayLevelEmphasis  
wavelet\_LHH\_gldm\_SmallDependenceHighGrayLevelEmphasis  
wavelet\_LHH\_ngtdm\_Busyness  
wavelet\_LHH\_glszm\_HighGrayLevelZoneEmphasis  
wavelet\_LHH\_glszm\_SmallAreaHighGrayLevelEmphasis  
wavelet\_LHH\_gIrlm\_LongRunHighGrayLevelEmphasis  
wavelet\_LHH\_glcm\_Autocorrelation  
wavelet\_LHH\_gIrlm\_ShortRunHighGrayLevelEmphasis  
wavelet\_LHH\_gldm\_HighGrayLevelEmphasis  
wavelet\_LHH\_gIrlm\_HighGrayLevelRunEmphasis  
wavelet\_LLL\_glszm\_ZoneVariance  
wavelet\_LHH\_ngtdm\_Complexity  
wavelet\_LHH\_gldm\_LargeDependenceLowGrayLevelEmphasis  
wavelet\_LHH\_gIrlm\_LongRunLowGrayLevelEmphasis  
wavelet\_LHH\_gIrlm\_ShortRunLowGrayLevelEmphasis  
wavelet\_LHH\_gldm\_LowGrayLevelEmphasis  
wavelet\_LHH\_gIrlm\_LowGrayLevelRunEmphasis  
wavelet\_LHH\_ngtdm\_Strength  
wavelet\_HLH\_gldm\_LargeDependenceHighGrayLevelEmphasis  
wavelet\_LLH\_gldm\_LargeDependenceLowGrayLevelEmphasis  
wavelet\_LLH\_glszm\_LargeAreaHighGrayLevelEmphasis  
wavelet\_LLH\_gIrlm\_LongRunLowGrayLevelEmphasis  
wavelet\_LLH\_gldm\_LowGrayLevelEmphasis  
wavelet\_LLH\_gIrlm\_ShortRunLowGrayLevelEmphasis  
wavelet\_LLH\_gIrlm\_LowGrayLevelRunEmphasis  
wavelet\_LLH\_glszm\_LowGrayLevelZoneEmphasis  
wavelet\_LLH\_gldm\_SmallDependenceLowGrayLevelEmphasis  
wavelet\_LLH\_glszm\_SmallAreaLowGrayLevelEmphasis  
wavelet\_LHH\_glszm\_LargeAreaHighGrayLevelEmphasis  
wavelet\_LHH\_glszm\_LowGrayLevelZoneEmphasis  
wavelet\_LHH\_gldm\_SmallDependenceLowGrayLevelEmphasis  
wavelet\_LHH\_glszm\_SmallAreaLowGrayLevelEmphasis  
wavelet\_LHL\_gldm\_LargeDependenceHighGrayLevelEmphasis  
wavelet\_LHL\_gIrlm\_LongRunLowGrayLevelEmphasis  
wavelet\_LHL\_gldm\_LowGrayLevelEmphasis  
wavelet\_LHL\_gIrlm\_ShortRunLowGrayLevelEmphasis  
wavelet\_LHL\_gIrlm\_LowGrayLevelRunEmphasis  
wavelet\_LHL\_gldm\_SmallDependenceLowGrayLevelEmphasis  
wavelet\_LHL\_glszm\_LowGrayLevelZoneEmphasis  
original\_glszm\_SmallAreaLowGrayLevelEmphasis  
wavelet\_HLL\_glszm\_LargeAreaHighGrayLevelEmphasis  
wavelet\_LHL\_glszm\_LargeAreaHighGrayLevelEmphasis

wavelet\_HLH\_glszm\_LargeAreaHighGrayLevelEmphasis  
wavelet\_HHL\_gldm\_LargeDependenceLowGrayLevelEmphasis  
wavelet\_HHL\_glszm\_LargeAreaLowGrayLevelEmphasis  
wavelet\_LHL\_gldm\_LargeDependenceLowGrayLevelEmphasis  
wavelet\_LHL\_glszm\_LargeAreaLowGrayLevelEmphasis  
wavelet\_LLH\_firstorder\_Skewness  
wavelet\_HLH\_glszm\_LargeAreaLowGrayLevelEmphasis  
wavelet\_HLL\_firstorder\_Skewness  
wavelet\_LHL\_firstorder\_Skewness  
wavelet\_HLH\_gIrlm\_LongRunLowGrayLevelEmphasis  
wavelet\_HLH\_gIrlm\_ShortRunLowGrayLevelEmphasis  
wavelet\_HLH\_gldm\_LowGrayLevelEmphasis  
wavelet\_HLH\_gIrlm\_LowGrayLevelRunEmphasis  
wavelet\_HLH\_glszm\_SmallAreaLowGrayLevelEmphasis  
wavelet\_HHL\_firstorder\_Skewness  
wavelet\_LHL\_glszm\_SmallAreaLowGrayLevelEmphasis  
wavelet\_HHL\_glszm\_LowGrayLevelZoneEmphasis  
wavelet\_HHL\_gldm\_SmallDependenceLowGrayLevelEmphasis  
wavelet\_HHL\_glszm\_SmallAreaLowGrayLevelEmphasis  
wavelet\_LHH\_glszm\_LargeAreaLowGrayLevelEmphasis  
wavelet\_HHL\_glcm\_ClusterShade  
wavelet\_HLH\_gldm\_SmallDependenceLowGrayLevelEmphasis  
wavelet\_HLH\_glszm\_LowGrayLevelZoneEmphasis  
wavelet\_HLH\_glcm\_Correlation  
wavelet\_HHH\_glszm\_SmallAreaLowGrayLevelEmphasis  
wavelet\_HLH\_firstorder\_Mean  
wavelet\_HLH\_firstorder\_Median  
wavelet\_HLH\_firstorder\_Skewness  
wavelet\_HLH\_glcm\_ClusterShade  
wavelet\_HHL\_firstorder\_Mean  
wavelet\_HHL\_firstorder\_Median  
wavelet\_HHL\_glcm\_Correlation  
wavelet\_LLH\_glcm\_ClusterShade  
wavelet\_LHH\_firstorder\_Mean  
wavelet\_LHH\_firstorder\_Median  
wavelet\_LHH\_firstorder\_Skewness  
wavelet\_LHH\_glcm\_ClusterShade  
wavelet\_LHL\_glcm\_ClusterShade  
wavelet\_HHH\_firstorder\_Mean  
wavelet\_HHH\_firstorder\_Median  
wavelet\_HHH\_glcm\_ClusterShade  
wavelet\_HHH\_firstorder\_Skewness  
wavelet\_HHH\_gldm\_SmallDependenceHighGrayLevelEmphasis  
wavelet\_HHH\_glszm\_SmallAreaHighGrayLevelEmphasis  
wavelet\_HHL\_gIrlm\_LongRunLowGrayLevelEmphasis

wavelet\_HHL\_gldm\_LowGrayLevelEmphasis  
wavelet\_HHL\_glrlm\_ShortRunLowGrayLevelEmphasis  
wavelet\_HHL\_glrlm\_LowGrayLevelRunEmphasis  
wavelet\_HHH\_glszm\_LargeAreaLowGrayLevelEmphasis  
wavelet\_HHH\_glszm\_LargeAreaHighGrayLevelEmphasis  
wavelet\_HHH\_gldm\_SmallDependenceLowGrayLevelEmphasis  
wavelet\_HHH\_glszm\_LowGrayLevelZoneEmphasis  
wavelet\_HLL\_glcm\_ClusterShade  
wavelet\_HLL\_gldm\_LargeDependenceLowGrayLevelEmphasis  
wavelet\_HLL\_glszm\_LargeAreaLowGrayLevelEmphasis  
wavelet\_HLH\_ngtdm\_Busyness  
wavelet\_HLH\_ngtdm\_Complexity  
wavelet\_HLH\_ngtdm\_Strength  
original\_firstorder\_Maximum  
wavelet\_LLL\_firstorder\_Maximum  
wavelet\_HLL\_glszm\_LargeAreaEmphasis  
wavelet\_LHL\_ngtdm\_Complexity  
wavelet\_LHL\_ngtdm\_Strength  
wavelet\_LHL\_ngtdm\_Busyness  
wavelet\_HLL\_ngtdm\_Strength  
wavelet\_LLH\_firstorder\_Maximum  
wavelet\_HLL\_ngtdm\_Complexity  
wavelet\_LHL\_firstorder\_Median  
wavelet\_LHH\_firstorder\_Minimum  
wavelet\_LHH\_glcm\_JointAverage  
wavelet\_LHH\_glcm\_SumAverage  
wavelet\_HLL\_gldm\_SmallDependenceHighGrayLevelEmphasis  
wavelet\_HLL\_glrlm\_LongRunHighGrayLevelEmphasis  
wavelet\_HLL\_glrlm\_ShortRunHighGrayLevelEmphasis  
wavelet\_HLL\_gldm\_HighGrayLevelEmphasis  
wavelet\_HLL\_glrlm\_HighGrayLevelRunEmphasis  
wavelet\_HLL\_glszm\_SmallAreaHighGrayLevelEmphasis  
wavelet\_HLL\_glszm\_HighGrayLevelZoneEmphasis  
wavelet\_HLL\_glcm\_Autocorrelation  
wavelet\_HLL\_ngtdm\_Busyness  
wavelet\_LLL\_glszm\_LargeAreaHighGrayLevelEmphasis  
wavelet\_LLL\_gldm\_DependenceVariance  
wavelet\_LLL\_gldm\_LargeDependenceHighGrayLevelEmphasis  
original\_firstorder\_Skewness  
wavelet\_LLL\_firstorder\_Skewness  
wavelet\_HLH\_glszm\_ZoneVariance  
wavelet\_HLH\_glszm\_LargeAreaEmphasis  
wavelet\_LLH\_glszm\_ZoneVariance  
wavelet\_LLH\_glszm\_LargeAreaEmphasis  
original\_gldm\_DependenceVariance

original\_gldm\_LargeDependenceHighGrayLevelEmphasis  
wavelet\_HHL\_glcm\_ClusterProminence  
wavelet\_HHL\_glszm\_ZoneVariance  
wavelet\_HHL\_glszm\_LargeAreaEmphasis  
original\_glcm\_ClusterShade  
wavelet\_LLL\_glcm\_ClusterShade  
original\_gldm\_LargeDependenceLowGrayLevelEmphasis  
original\_firstorder\_90Percentile  
wavelet\_LLL\_firstorder\_90Percentile  
wavelet\_LLH\_ngtdm\_Strength  
wavelet\_LLH\_ngtdm\_Complexity  
wavelet\_LLH\_ngtdm\_Busyness  
wavelet\_LLH\_glcm\_ClusterProminence  
wavelet\_LLH\_gldm\_LargeDependenceHighGrayLevelEmphasis  
wavelet\_LLH\_gldm\_SmallDependenceHighGrayLevelEmphasis  
wavelet\_LLH\_glszm\_SmallAreaHighGrayLevelEmphasis  
wavelet\_LLH\_glszm\_HighGrayLevelZoneEmphasis  
wavelet\_LLH\_glrIm\_LongRunHighGrayLevelEmphasis  
wavelet\_LLH\_glcm\_Autocorrelation  
wavelet\_LLH\_glrIm\_ShortRunHighGrayLevelEmphasis  
wavelet\_LLH\_gldm\_HighGrayLevelEmphasis  
wavelet\_LLH\_glrIm\_HighGrayLevelRunEmphasis  
original\_firstorder\_Energy  
original\_firstorder\_TotalEnergy  
wavelet\_LLL\_firstorder\_Energy  
wavelet\_LLL\_firstorder\_TotalEnergy  
original\_glcm\_ClusterProminence  
wavelet\_LLL\_glcm\_ClusterProminence  
wavelet\_HLL\_glcm\_ClusterProminence  
wavelet\_HLL\_firstorder\_Median  
wavelet\_HLL\_firstorder\_Mean  
wavelet\_HHH\_firstorder\_Energy  
wavelet\_HHH\_firstorder\_TotalEnergy  
wavelet\_HHH\_glszm\_ZoneVariance  
wavelet\_HHH\_glszm\_LargeAreaEmphasis  
wavelet\_HLH\_ngtdm\_Contrast  
wavelet\_LHH\_glszm\_SizeZoneNonUniformity  
wavelet\_LHH\_glszm\_ZoneVariance  
wavelet\_LHH\_glszm\_LargeAreaEmphasis  
wavelet\_LHH\_firstorder\_Maximum  
wavelet\_HHL\_ngtdm\_Contrast  
wavelet\_HHH\_glszm\_SizeZoneNonUniformity  
wavelet\_HHH\_glszm\_GrayLevelNonUniformity

## Cluster (Middle Green)

wavelet\_HHH\_gldm\_DependenceNonUniformityNormalized  
original\_glrlm\_LongRunEmphasis  
original\_glcm\_Idmn  
wavelet\_LLL\_glcm\_Idmn  
wavelet\_LHL\_glcm\_Idmn  
wavelet\_LLH\_glcm\_Idmn  
wavelet\_HHH\_glcm\_Idmn  
wavelet\_HLH\_glcm\_Idmn  
wavelet\_LHH\_glcm\_Idmn  
wavelet\_HHL\_glcm\_Idmn  
wavelet\_LLL\_glcm\_Imc2  
wavelet\_LHL\_glrlm\_ShortRunEmphasis  
original\_glrlm\_ShortRunEmphasis  
wavelet\_LLH\_glrlm\_ShortRunEmphasis  
wavelet\_HLL\_glrlm\_RunPercentage  
wavelet\_LLL\_glrlm\_RunPercentage  
wavelet\_HLL\_glrlm\_ShortRunEmphasis  
wavelet\_LLL\_glrlm\_ShortRunEmphasis  
original\_glrlm\_RunPercentage  
wavelet\_LHL\_glrlm\_RunPercentage  
wavelet\_LLH\_glrlm\_RunPercentage  
wavelet\_LLL\_glrlm\_RunLengthNonUniformityNormalized  
wavelet\_HLL\_glrlm\_RunLengthNonUniformityNormalized  
wavelet\_HHL\_glrlm\_ShortRunEmphasis  
wavelet\_HHL\_glrlm\_RunPercentage  
wavelet\_HLL\_glrlm\_RunEntropy  
wavelet\_HLL\_glcm\_SumEntropy  
wavelet\_HLL\_firstorder\_Entropy  
wavelet\_HLL\_glcm\_JointEntropy  
wavelet\_HHL\_glrlm\_RunLengthNonUniformityNormalized  
original\_glrlm\_RunEntropy  
original\_glszm\_ZoneEntropy  
wavelet\_LLL\_glcm\_JointEntropy  
wavelet\_LLL\_glcm\_SumEntropy  
wavelet\_LLL\_firstorder\_Entropy  
original\_glcm\_DifferenceEntropy  
wavelet\_LLL\_glcm\_DifferenceEntropy  
wavelet\_LLL\_glrlm\_LongRunEmphasis  
original\_glrlm\_RunLengthNonUniformityNormalized  
wavelet\_LLH\_glrlm\_RunLengthNonUniformityNormalized  
wavelet\_HHH\_glrlm\_ShortRunEmphasis  
wavelet\_HHH\_glrlm\_RunPercentage  
wavelet\_LHH\_glrlm\_RunPercentage  
wavelet\_LHL\_glrlm\_RunLengthNonUniformityNormalized

wavelet\_LHH\_gIrlm\_ShortRunEmphasis  
wavelet\_LLL\_glszm\_SmallAreaEmphasis  
wavelet\_HHH\_gIrlm\_RunEntropy  
wavelet\_HHL\_gIrlm\_RunEntropy  
wavelet\_HHH\_gldm\_DependenceEntropy  
wavelet\_HHH\_glcm\_InverseVariance  
wavelet\_HLH\_gIrlm\_ShortRunEmphasis  
wavelet\_HLH\_gIrlm\_RunPercentage  
wavelet\_HHH\_glcm\_Idn  
wavelet\_LHH\_glcm\_Idn  
wavelet\_HHL\_glcm\_Idn  
wavelet\_LHL\_gldm\_DependenceEntropy  
wavelet\_LHH\_gldm\_DependenceEntropy  
wavelet\_LLL\_gIrlm\_RunEntropy  
wavelet\_LLL\_gldm\_DependenceEntropy  
wavelet\_LLL\_glszm\_ZoneEntropy  
original\_gldm\_DependenceEntropy  
wavelet\_HLL\_gldm\_DependenceEntropy  
wavelet\_HLL\_glszm\_ZoneEntropy  
wavelet\_HLH\_gldm\_DependenceEntropy  
wavelet\_HLL\_glcm\_Idn  
wavelet\_LLH\_gldm\_DependenceEntropy  
wavelet\_HHL\_gldm\_DependenceEntropy  
wavelet\_HLL\_glcm\_Idm  
wavelet\_LHL\_glcm\_Idn  
wavelet\_LLH\_glcm\_Idn  
wavelet\_HLH\_glcm\_Idn  
original\_glcm\_Idn  
wavelet\_LLL\_glcm\_Idn  
original\_glcm\_Imc2  
wavelet\_HLL\_glcm\_Imc2  
wavelet\_HLL\_gIrlm\_LongRunEmphasis  
wavelet\_LHL\_glcm\_DifferenceEntropy  
wavelet\_LHL\_glcm\_SumEntropy  
wavelet\_LHL\_glcm\_JointEntropy  
wavelet\_LHL\_firstorder\_Entropy  
wavelet\_LHL\_gIrlm\_LongRunEmphasis  
wavelet\_LHH\_gIrlm\_RunLengthNonUniformityNormalized  
wavelet\_LLH\_gIrlm\_LongRunEmphasis  
original\_glcm\_JointEntropy  
original\_glcm\_SumEntropy  
original\_firstorder\_Entropy  
wavelet\_HHL\_glcm\_SumEntropy  
wavelet\_HHL\_glcm\_DifferenceEntropy  
wavelet\_HHL\_glcm\_JointEntropy



wavelet\_HHL\_firstorder\_Entropy  
wavelet\_HLL\_glszm\_SmallAreaEmphasis  
wavelet\_HHL\_glszm\_ZoneEntropy  
wavelet\_HLH\_glszm\_ZoneEntropy  
wavelet\_HLH\_gIrlm\_RunEntropy  
wavelet\_HLL\_glcm\_DifferenceEntropy  
wavelet\_LLH\_glcm\_Id  
wavelet\_HLH\_gIrlm\_RunLengthNonUniformityNormalized  
wavelet\_LLH\_gIrlm\_RunEntropy  
wavelet\_LLH\_glcm\_DifferenceEntropy  
wavelet\_LLH\_firstorder\_Entropy  
wavelet\_LLH\_glcm\_JointEntropy  
wavelet\_LLH\_glcm\_SumEntropy  
wavelet\_LHH\_gIrlm\_RunEntropy  
wavelet\_LLH\_glszm\_ZoneEntropy  
wavelet\_LHL\_gIrlm\_RunEntropy  
wavelet\_LHL\_glszm\_ZoneEntropy  
wavelet\_LHL\_glcm\_Imc2  
wavelet\_LLH\_glcm\_Imc2  
wavelet\_LHL\_glszm\_SmallAreaEmphasis  
wavelet\_HHL\_glszm\_SmallAreaEmphasis  
wavelet\_HLH\_glcm\_SumEntropy  
wavelet\_HLH\_glcm\_JointEntropy  
wavelet\_HLH\_glcm\_DifferenceEntropy  
wavelet\_HLH\_firstorder\_Entropy  
wavelet\_HLH\_glcm\_InverseVariance  
wavelet\_HLH\_glcm\_Id  
original\_shape\_Sphericity  
wavelet\_HHL\_glcm\_Id  
wavelet\_HHL\_gIrlm\_LongRunEmphasis  
original\_glszm\_SmallAreaEmphasis  
wavelet\_LLL\_glszm\_SizeZoneNonUniformityNormalized  
wavelet\_LLH\_glszm\_SmallAreaEmphasis  
wavelet\_LLH\_glcm\_InverseVariance  
wavelet\_LLH\_glcm\_Idm  
wavelet\_HHH\_gIrlm\_LongRunEmphasis  
wavelet\_LHH\_gIrlm\_LongRunEmphasis  
wavelet\_LHH\_glszm\_ZoneEntropy  
wavelet\_LHH\_glcm\_Idm  
wavelet\_LHH\_glcm\_SumEntropy  
wavelet\_LHH\_glcm\_DifferenceEntropy  
wavelet\_LHH\_glcm\_JointEntropy  
wavelet\_LHH\_firstorder\_Entropy  
wavelet\_LLL\_gldm\_SmallDependenceEmphasis  
wavelet\_LLL\_glszm\_ZonePercentage

wavelet\_HHH\_glcm\_SumEntropy  
wavelet\_HHH\_glcm\_DifferenceEntropy  
wavelet\_HHH\_glcm\_JointEntropy  
wavelet\_HHH\_firstorder\_Entropy  
wavelet\_LHL\_glcm\_Id  
wavelet\_LHH\_glcm\_InverseVariance  
wavelet\_LHH\_glcm\_Id  
wavelet\_HHH\_glrlm\_RunLengthNonUniformityNormalized  
wavelet\_HHH\_glcm\_Idm  
wavelet\_HHH\_glcm\_Id  
wavelet\_HHH\_glszm\_ZoneEntropy  
wavelet\_LHL\_gldm\_DependenceNonUniformityNormalized  
original\_shape\_MinorAxis  
wavelet\_HHL\_glcm\_InverseVariance  
wavelet\_HHL\_glcm\_Idm  
original\_shape\_SurfaceVolumeRatio  
wavelet\_HLL\_gldm\_SmallDependenceEmphasis  
wavelet\_HLL\_glszm\_ZonePercentage  
wavelet\_LLL\_glcm\_Imc1  
wavelet\_LHL\_glcm\_InverseVariance  
wavelet\_LHL\_glcm\_Idm  
wavelet\_HLH\_glcm\_Idm  
wavelet\_HLH\_glrlm\_LongRunEmphasis  
wavelet\_LHL\_firstorder\_Kurtosis  
wavelet\_HHH\_gldm\_DependenceVariance  
wavelet\_LHL\_glcm\_Correlation  
wavelet\_HHH\_glszm\_ZonePercentage  
wavelet\_HHH\_gldm\_SmallDependenceEmphasis  
wavelet\_HLH\_glcm\_Imc1  
wavelet\_HLL\_firstorder\_90Percentile  
original\_firstorder\_Mean  
wavelet\_LLL\_firstorder\_Mean  
wavelet\_HLH\_glszm\_GrayLevelNonUniformityNormalized  
wavelet\_HLH\_gldm\_DependenceNonUniformityNormalized  
wavelet\_HLH\_gldm\_SmallDependenceEmphasis  
wavelet\_HLH\_firstorder\_10Percentile  
original\_glcm\_InverseVariance  
original\_glcm\_Idm  
wavelet\_HLH\_firstorder\_InterquartileRange  
wavelet\_HLH\_firstorder\_90Percentile  
wavelet\_HLH\_firstorder\_RootMeanSquared  
wavelet\_HLH\_glcm\_DifferenceAverage  
wavelet\_HLH\_firstorder\_MeanAbsoluteDeviation  
wavelet\_HLH\_firstorder\_RobustMeanAbsoluteDeviation  
wavelet\_HLH\_firstorder\_Uniformity

wavelet\_HLH\_gIrlm\_GrayLevelNonUniformityNormalized  
wavelet\_HLL\_firstorder\_10Percentile  
original\_glcm\_Correlation  
wavelet\_LLL\_glcm\_Correlation  
wavelet\_LLL\_firstorder\_Kurtosis  
original\_shape\_Flatness  
wavelet\_HLL\_firstorder\_RootMeanSquared  
wavelet\_HLL\_glszm\_GrayLevelNonUniformityNormalized  
original\_shape\_Elongation  
wavelet\_HLL\_glcm\_Imc1  
original\_shape\_Maximum2DDiameterRow  
original\_shape\_Maximum3DDiameter  
original\_shape\_MajorAxis  
original\_glszm\_GrayLevelVariance  
wavelet\_HLL\_gldm\_DependenceNonUniformityNormalized  
wavelet\_HLL\_glcm\_Id  
wavelet\_HLL\_glcm\_InverseVariance  
wavelet\_HLL\_glcm\_Idm  
wavelet\_HLL\_firstorder\_Uniformity  
wavelet\_HLL\_gIrlm\_GrayLevelNonUniformityNormalized  
wavelet\_HLL\_glcm\_DifferenceAverage  
wavelet\_HLL\_firstorder\_MeanAbsoluteDeviation  
wavelet\_LLH\_glcm\_Correlation  
wavelet\_LLH\_glcm\_Imc1  
wavelet\_LLL\_glcm\_JointAverage  
wavelet\_LLL\_glcm\_SumAverage  
wavelet\_LHL\_glszm\_SizeZoneNonUniformityNormalized  
wavelet\_HHH\_glszm\_SmallAreaEmphasis  
wavelet\_LHH\_gldm\_DependenceNonUniformityNormalized  
original\_shape\_LeastAxis  
original\_glcm\_Imc1  
wavelet\_HHH\_glcm\_MaximumProbability  
wavelet\_HHH\_firstorder\_Uniformity  
wavelet\_HHH\_gIrlm\_GrayLevelNonUniformityNormalized  
wavelet\_HHH\_glcm\_DifferenceAverage  
wavelet\_HHH\_firstorder\_MeanAbsoluteDeviation  
wavelet\_HHH\_firstorder\_RootMeanSquared  
wavelet\_HHH\_firstorder\_90Percentile  
wavelet\_HHH\_firstorder\_10Percentile  
wavelet\_HHH\_firstorder\_InterquartileRange  
wavelet\_HHH\_firstorder\_RobustMeanAbsoluteDeviation  
wavelet\_LLL\_gldm\_DependenceNonUniformityNormalized  
wavelet\_LHL\_gldm\_SmallDependenceEmphasis  
wavelet\_LHL\_glszm\_ZonePercentage  
wavelet\_LHL\_glszm\_GrayLevelNonUniformityNormalized

wavelet\_LHL\_firstorder\_InterquartileRange  
wavelet\_LHL\_glcm\_DifferenceAverage  
wavelet\_LHL\_firstorder\_10Percentile  
wavelet\_LHL\_firstorder\_MeanAbsoluteDeviation  
wavelet\_LHL\_firstorder\_RootMeanSquared  
wavelet\_LHL\_firstorder\_RobustMeanAbsoluteDeviation  
wavelet\_LHL\_firstorder\_Uniformity  
wavelet\_LHL\_glrIm\_GrayLevelNonUniformityNormalized  
wavelet\_LHH\_firstorder\_10Percentile  
wavelet\_LHH\_firstorder\_90Percentile  
wavelet\_LHH\_firstorder\_InterquartileRange  
wavelet\_LHH\_firstorder\_RobustMeanAbsoluteDeviation  
wavelet\_LHH\_firstorder\_Uniformity  
wavelet\_LHH\_glrIm\_GrayLevelNonUniformityNormalized  
wavelet\_LHH\_firstorder\_RootMeanSquared  
wavelet\_LHH\_glcm\_DifferenceAverage  
wavelet\_LHH\_firstorder\_MeanAbsoluteDeviation  
original\_firstorder\_Range  
wavelet\_LLL\_firstorder\_Range  
original\_shape\_Maximum2DDiameterColumn  
wavelet\_HHL\_gldm\_DependenceNonUniformityNormalized  
wavelet\_HHL\_firstorder\_InterquartileRange  
wavelet\_HHL\_firstorder\_RobustMeanAbsoluteDeviation  
wavelet\_HHL\_firstorder\_90Percentile  
wavelet\_HHL\_firstorder\_10Percentile  
wavelet\_HHL\_firstorder\_RootMeanSquared  
wavelet\_HHL\_firstorder\_Uniformity  
wavelet\_HHL\_glrIm\_GrayLevelNonUniformityNormalized  
wavelet\_HHL\_glcm\_DifferenceAverage  
wavelet\_HHL\_firstorder\_MeanAbsoluteDeviation  
wavelet\_HHL\_glcm\_Imc2  
wavelet\_HHL\_glszm\_GrayLevelNonUniformityNormalized  
original\_gldm\_DependenceNonUniformityNormalized  
original\_glszm\_GrayLevelNonUniformityNormalized  
wavelet\_LLL\_glszm\_GrayLevelNonUniformityNormalized  
wavelet\_LLL\_glcm\_DifferenceAverage  
original\_glcm\_DifferenceAverage  
original\_firstorder\_MeanAbsoluteDeviation  
wavelet\_LLL\_firstorder\_MeanAbsoluteDeviation  
original\_glszm\_SizeZoneNonUniformityNormalized  
wavelet\_LLH\_glszm\_SizeZoneNonUniformityNormalized  
wavelet\_HLH\_glcm\_Imc2  
wavelet\_LLH\_gldm\_SmallDependenceEmphasis  
wavelet\_LLH\_glszm\_ZonePercentage  
original\_glcm\_Id

wavelet\_LLH\_glcm\_DifferenceAverage  
wavelet\_LLH\_gldm\_DependenceNonUniformityNormalized  
original\_gldm\_SmallDependenceEmphasis  
original\_glszm\_ZonePercentage  
wavelet\_LLL\_glcm\_Id  
wavelet\_LLH\_firstorder\_Uniformity  
wavelet\_LLH\_glrlm\_GrayLevelNonUniformityNormalized  
wavelet\_LLH\_firstorder\_InterquartileRange  
wavelet\_LLH\_firstorder\_RobustMeanAbsoluteDeviation  
wavelet\_LLH\_glszm\_GrayLevelNonUniformityNormalized  
wavelet\_LLH\_firstorder\_10Percentile  
wavelet\_LLH\_firstorder\_MeanAbsoluteDeviation  
wavelet\_LLH\_firstorder\_RootMeanSquared  
original\_shape\_Maximum2DDiameterSlice  
wavelet\_HLH\_glszm\_SmallAreaEmphasis  
wavelet\_HLL\_glszm\_SizeZoneNonUniformityNormalized  
wavelet\_LHH\_glszm\_SmallAreaEmphasis  
wavelet\_LLL\_firstorder\_Minimum  
original\_firstorder\_Minimum  
original\_glcm\_JointAverage  
original\_glcm\_SumAverage  
original\_firstorder\_RootMeanSquared  
wavelet\_LLL\_firstorder\_RootMeanSquared  
original\_firstorder\_10Percentile  
wavelet\_LLL\_firstorder\_10Percentile  
original\_ngtdm\_Coarseness  
wavelet\_LLL\_ngtdm\_Coarseness  
original\_gldm\_DependenceNonUniformity  
original\_glszm\_SizeZoneNonUniformity  
wavelet\_HLH\_glszm\_GrayLevelNonUniformity  
wavelet\_HLL\_gldm\_DependenceNonUniformity  
wavelet\_HLL\_glszm\_SizeZoneNonUniformity  
wavelet\_HHL\_glszm\_GrayLevelNonUniformity  
wavelet\_HHL\_gldm\_DependenceNonUniformity  
wavelet\_LLH\_glszm\_GrayLevelNonUniformity  
wavelet\_HLH\_gldm\_DependenceNonUniformity  
wavelet\_HHL\_gldm\_GrayLevelNonUniformity  
wavelet\_HHL\_glrlm\_GrayLevelNonUniformity  
wavelet\_LLH\_gldm\_DependenceNonUniformity  
wavelet\_LLL\_gldm\_DependenceNonUniformity  
wavelet\_LLL\_glszm\_SizeZoneNonUniformity  
wavelet\_HLL\_glszm\_GrayLevelNonUniformity  
wavelet\_LHL\_gldm\_GrayLevelNonUniformity  
wavelet\_LHL\_glrlm\_GrayLevelNonUniformity  
wavelet\_LLH\_gldm\_GrayLevelNonUniformity

wavelet\_LLH\_gIrlm\_GrayLevelNonUniformity  
wavelet\_LHH\_gIldm\_GrayLevelNonUniformity  
wavelet\_LHH\_gIrlm\_GrayLevelNonUniformity  
original\_gIlszm\_GrayLevelNonUniformity  
original\_shape\_SurfaceArea  
wavelet\_LLL\_gIlszm\_GrayLevelNonUniformity  
wavelet\_LHL\_gIldm\_DependenceNonUniformity  
wavelet\_LHH\_gIrlm\_RunLengthNonUniformity  
wavelet\_HHH\_gIldm\_DependenceNonUniformity  
wavelet\_HHH\_gIrlm\_RunLengthNonUniformity  
wavelet\_HHH\_ngtdm\_Coarseness  
wavelet\_LHL\_ngtdm\_Coarseness  
wavelet\_HLH\_gIrlm\_RunLengthNonUniformity  
wavelet\_HHH\_gIrlm\_GrayLevelNonUniformity  
wavelet\_HHL\_gIrlm\_RunLengthNonUniformity  
wavelet\_LHL\_gIrlm\_RunLengthNonUniformity  
original\_shape\_Volume  
wavelet\_HLL\_gIrlm\_RunLengthNonUniformity  
wavelet\_LLL\_gIrlm\_RunLengthNonUniformity  
original\_gIrlm\_RunLengthNonUniformity  
wavelet\_LLH\_gIrlm\_RunLengthNonUniformity  
wavelet\_LLH\_ngtdm\_Coarseness  
wavelet\_LHH\_ngtdm\_Coarseness  
wavelet\_HHL\_ngtdm\_Coarseness  
wavelet\_HHH\_gIldm\_GrayLevelNonUniformity  
wavelet\_HLH\_ngtdm\_Coarseness  
wavelet\_LHH\_gIldm\_DependenceNonUniformity  
wavelet\_HLL\_ngtdm\_Coarseness  
wavelet\_HLH\_gIldm\_GrayLevelNonUniformity  
wavelet\_HLH\_gIrlm\_GrayLevelNonUniformity  
wavelet\_LLL\_gIldm\_GrayLevelNonUniformity  
wavelet\_LLL\_gIrlm\_GrayLevelNonUniformity  
original\_gIldm\_GrayLevelNonUniformity  
original\_gIrlm\_GrayLevelNonUniformity  
wavelet\_HLL\_gIldm\_GrayLevelNonUniformity  
wavelet\_HLL\_gIrlm\_GrayLevelNonUniformity  
wavelet\_HLL\_firstorder\_Kurtosis  
wavelet\_HLL\_firstorder\_InterquartileRange  
wavelet\_HLL\_firstorder\_RobustMeanAbsoluteDeviation  
wavelet\_LHH\_gIlszm\_GrayLevelNonUniformityNormalized  
wavelet\_LHH\_gIldm\_SmallDependenceEmphasis  
wavelet\_LHH\_gIlszm\_ZonePercentage  
wavelet\_HHH\_gIcm\_Imc2  
wavelet\_HHH\_gIlszm\_GrayLevelVariance  
wavelet\_HHH\_firstorder\_Variance

wavelet\_HHH\_glcm\_JointEnergy  
wavelet\_HHH\_glcm\_DifferenceVariance  
wavelet\_HHH\_glcm\_ClusterTendency  
wavelet\_HHH\_glcm\_Contrast  
wavelet\_HHH\_glcm\_SumSquares  
wavelet\_HHH\_gldm\_GrayLevelVariance  
wavelet\_HHH\_glrlm\_GrayLevelVariance  
wavelet\_LHL\_glcm\_JointEnergy  
wavelet\_LHL\_gldm\_LargeDependenceEmphasis  
wavelet\_LHL\_glrlm\_RunVariance  
wavelet\_HHL\_glszm\_SizeZoneNonUniformityNormalized  
wavelet\_HHL\_glcm\_Imc1  
wavelet\_HHL\_gldm\_SmallDependenceEmphasis  
wavelet\_HHL\_glszm\_ZonePercentage  
wavelet\_HLH\_glszm\_SizeZoneNonUniformityNormalized  
wavelet\_LHH\_glszm\_SizeZoneNonUniformityNormalized  
wavelet\_LHH\_glszm\_GrayLevelNonUniformity  
original\_firstorder\_Uniformity  
original\_glrlm\_GrayLevelNonUniformityNormalized  
wavelet\_LLH\_firstorder\_90Percentile  
wavelet\_LLH\_glcm\_JointEnergy  
wavelet\_LLL\_glcm\_InverseVariance  
wavelet\_LLL\_glcm\_Idm  
wavelet\_LLH\_gldm\_LargeDependenceEmphasis  
wavelet\_LLH\_glrlm\_RunVariance  
original\_firstorder\_Kurtosis  
original\_firstorder\_InterquartileRange  
original\_firstorder\_RobustMeanAbsoluteDeviation  
wavelet\_LLL\_firstorder\_InterquartileRange  
wavelet\_LLL\_firstorder\_RobustMeanAbsoluteDeviation  
wavelet\_HLL\_firstorder\_Range  
wavelet\_LHL\_firstorder\_90Percentile  
wavelet\_LHL\_glcm\_Imc1  
wavelet\_LHH\_glcm\_Imc2  
wavelet\_LLL\_firstorder\_Uniformity  
wavelet\_LLL\_glrlm\_GrayLevelNonUniformityNormalized  
wavelet\_LHL\_glszm\_GrayLevelNonUniformity  
wavelet\_HHH\_gldm\_LargeDependenceEmphasis  
wavelet\_HHH\_glrlm\_RunVariance

### **Cluster (Right Mixed)**

original\_firstorder\_Median  
wavelet\_LLL\_glcm\_JointEnergy  
wavelet\_LLL\_firstorder\_Median

wavelet\_HHH\_firstorder\_Kurtosis  
wavelet\_HHH\_firstorder\_Minimum  
wavelet\_HHH\_firstorder\_Range  
wavelet\_HHH\_glcmm\_JointAverage  
wavelet\_HHH\_glcmm\_SumAverage  
wavelet\_LLH\_firstorder\_Kurtosis  
wavelet\_LLH\_firstorder\_Minimum  
wavelet\_LLH\_glcmm\_JointAverage  
wavelet\_LLH\_glcmm\_SumAverage  
wavelet\_HHH\_glcmm\_Correlation  
original\_gldm\_LargeDependenceEmphasis  
original\_glrmm\_RunVariance  
wavelet\_HLL\_ngtdm\_Contrast  
wavelet\_HLL\_glcmm\_Correlation  
wavelet\_HLH\_glszm\_SizeZoneNonUniformity  
wavelet\_HLL\_glcmm\_Contrast  
wavelet\_HLL\_glcmm\_DifferenceVariance  
wavelet\_LLL\_gldm\_LargeDependenceEmphasis  
wavelet\_LLL\_glrmm\_RunVariance  
wavelet\_LLH\_gldm\_DependenceVariance  
wavelet\_LLH\_glcmm\_MaximumProbability  
wavelet\_LLH\_ngtdm\_Contrast  
wavelet\_LHL\_gldm\_DependenceVariance  
wavelet\_LHL\_glcmm\_MaximumProbability  
wavelet\_HHH\_glcmm\_Imc1  
wavelet\_HHL\_glszm\_SizeZoneNonUniformity  
wavelet\_HHL\_firstorder\_Energy  
wavelet\_HHL\_firstorder\_TotalEnergy  
wavelet\_LHH\_glszm\_GrayLevelVariance  
wavelet\_LHH\_firstorder\_Energy  
wavelet\_LHH\_firstorder\_TotalEnergy  
wavelet\_LHH\_glcmm\_DifferenceVariance  
wavelet\_LHH\_glcmm\_Contrast  
wavelet\_LHH\_glcmm\_SumSquares  
wavelet\_LHH\_glcmm\_ClusterTendency  
wavelet\_LHH\_firstorder\_Variance  
wavelet\_LHH\_gldm\_GrayLevelVariance  
wavelet\_LHH\_glrmm\_GrayLevelVariance  
wavelet\_LHL\_firstorder\_Energy  
wavelet\_LHL\_firstorder\_TotalEnergy  
wavelet\_LHL\_firstorder\_Maximum  
wavelet\_LHL\_glszm\_SizeZoneNonUniformity  
wavelet\_LHL\_glszm\_GrayLevelVariance  
wavelet\_LHL\_glrmm\_GrayLevelVariance  
wavelet\_LHL\_gldm\_GrayLevelVariance



wavelet\_LHL\_firstorder\_Variance  
wavelet\_LHL\_glcm\_SumSquares  
wavelet\_LHL\_glcm\_ClusterTendency  
wavelet\_LHL\_glcm\_Contrast  
wavelet\_LHL\_glcm\_DifferenceVariance  
wavelet\_HLL\_glcm\_JointEnergy  
wavelet\_HLL\_gldm\_LargeDependenceEmphasis  
wavelet\_HLL\_glrlm\_RunVariance  
wavelet\_LHL\_firstorder\_Minimum  
wavelet\_LHL\_glcm\_JointAverage  
wavelet\_LHL\_glcm\_SumAverage  
wavelet\_HLL\_firstorder\_Maximum  
wavelet\_LHL\_firstorder\_Range  
wavelet\_LHL\_ngtdm\_Contrast  
wavelet\_HHL\_firstorder\_Minimum  
wavelet\_HHL\_glcm\_JointAverage  
wavelet\_HHL\_glcm\_SumAverage  
wavelet\_HLH\_firstorder\_Maximum  
wavelet\_HLH\_firstorder\_Minimum  
wavelet\_HLH\_glcm\_JointAverage  
wavelet\_HLH\_glcm\_SumAverage  
wavelet\_HLH\_firstorder\_Range  
wavelet\_HLH\_firstorder\_Kurtosis  
wavelet\_HLL\_firstorder\_Minimum  
wavelet\_HLL\_glcm\_JointAverage  
wavelet\_HLL\_glcm\_SumAverage  
wavelet\_HHH\_glszm\_SizeZoneNonUniformityNormalized  
wavelet\_LHH\_firstorder\_Kurtosis  
wavelet\_LHH\_glcm\_Imc1  
wavelet\_LHH\_firstorder\_Range  
wavelet\_LLH\_firstorder\_Variance  
wavelet\_LLH\_gldm\_GrayLevelVariance  
wavelet\_LLH\_glrlm\_GrayLevelVariance  
wavelet\_LLH\_glcm\_SumSquares  
wavelet\_LLH\_glcm\_ClusterTendency  
wavelet\_LLH\_glcm\_Contrast  
wavelet\_LLH\_glcm\_DifferenceVariance  
wavelet\_LLH\_glszm\_SizeZoneNonUniformity  
wavelet\_LLH\_firstorder\_Energy  
wavelet\_LLH\_firstorder\_TotalEnergy  
wavelet\_LLH\_firstorder\_Median  
original\_ngtdm\_Complexity  
wavelet\_LLL\_ngtdm\_Busyness  
wavelet\_LHL\_firstorder\_Mean  
wavelet\_LLL\_ngtdm\_Strength

original\_gldm\_SmallDependenceHighGrayLevelEmphasis  
original\_glszm\_SmallAreaHighGrayLevelEmphasis  
original\_glszm\_HighGrayLevelZoneEmphasis  
original\_glrlm\_LongRunHighGrayLevelEmphasis  
original\_glrlm\_ShortRunHighGrayLevelEmphasis  
original\_glcm\_Autocorrelation  
original\_gldm\_HighGrayLevelEmphasis  
original\_glrlm\_HighGrayLevelRunEmphasis  
original\_ngtdm\_Strength  
original\_ngtdm\_Busyness  
wavelet\_LLH\_firstorder\_Mean  
wavelet\_LLH\_firstorder\_Range  
wavelet\_LLH\_glszm\_GrayLevelVariance  
wavelet\_LLL\_gldm\_SmallDependenceHighGrayLevelEmphasis  
wavelet\_LLL\_glszm\_SmallAreaHighGrayLevelEmphasis  
wavelet\_LLL\_glszm\_HighGrayLevelZoneEmphasis  
wavelet\_LLL\_glrlm\_LongRunHighGrayLevelEmphasis  
wavelet\_LLL\_glcm\_Autocorrelation  
wavelet\_LLL\_glrlm\_ShortRunHighGrayLevelEmphasis  
wavelet\_LLL\_gldm\_HighGrayLevelEmphasis  
wavelet\_LLL\_glrlm\_HighGrayLevelRunEmphasis  
original\_ngtdm\_Contrast  
wavelet\_LLL\_ngtdm\_Contrast  
wavelet\_HLH\_firstorder\_Energy  
wavelet\_HLH\_firstorder\_TotalEnergy  
wavelet\_HLH\_glszm\_GrayLevelVariance  
wavelet\_HLH\_glszm\_ZonePercentage  
wavelet\_HLH\_glcm\_Contrast  
wavelet\_HLH\_glcm\_SumSquares  
wavelet\_HLH\_glcm\_ClusterTendency  
wavelet\_HLH\_glcm\_DifferenceVariance  
wavelet\_HLH\_glrlm\_GrayLevelVariance  
wavelet\_HLH\_gldm\_GrayLevelVariance  
wavelet\_HLH\_firstorder\_Variance  
wavelet\_HLH\_gldm\_DependenceVariance  
wavelet\_HLH\_glcm\_JointEnergy  
wavelet\_HLH\_glcm\_MaximumProbability  
wavelet\_HLH\_gldm\_LargeDependenceEmphasis  
wavelet\_HLH\_glrlm\_RunVariance  
wavelet\_HLL\_glszm\_GrayLevelVariance  
wavelet\_HLL\_firstorder\_Energy  
wavelet\_HLL\_firstorder\_TotalEnergy  
wavelet\_HLL\_glrlm\_GrayLevelVariance  
wavelet\_HLL\_gldm\_GrayLevelVariance  
wavelet\_HLL\_firstorder\_Variance

wavelet\_HLL\_glcm\_SumSquares  
wavelet\_HLL\_glcm\_ClusterTendency  
wavelet\_LLL\_glcm\_ClusterTendency  
original\_glcm\_SumSquares  
original\_glcm\_ClusterTendency  
wavelet\_LLL\_ngtdm\_Complexity  
wavelet\_LLL\_glszm\_GrayLevelVariance  
original\_glrIm\_GrayLevelVariance  
original\_gldm\_GrayLevelVariance  
original\_firstorder\_Variance  
wavelet\_LLL\_glcm\_SumSquares  
wavelet\_LLL\_glrIm\_GrayLevelVariance  
wavelet\_LLL\_gldm\_GrayLevelVariance  
wavelet\_LLL\_firstorder\_Variance  
original\_glcm\_Contrast  
original\_glcm\_DifferenceVariance  
wavelet\_LLL\_glcm\_Contrast  
wavelet\_LLL\_glcm\_DifferenceVariance  
wavelet\_HHL\_gldm\_DependenceVariance  
wavelet\_HHL\_glcm\_MaximumProbability  
wavelet\_HHL\_glcm\_JointEnergy  
wavelet\_HHL\_gldm\_LargeDependenceEmphasis  
wavelet\_HHL\_glrIm\_RunVariance  
wavelet\_HHL\_glszm\_GrayLevelVariance  
wavelet\_HHL\_glcm\_DifferenceVariance  
wavelet\_HHL\_glcm\_Contrast  
wavelet\_HHL\_glcm\_SumSquares  
wavelet\_HHL\_glcm\_ClusterTendency  
wavelet\_HHL\_firstorder\_Variance  
wavelet\_HHL\_gldm\_GrayLevelVariance  
wavelet\_HHL\_glrIm\_GrayLevelVariance  
wavelet\_HHL\_firstorder\_Range  
wavelet\_HHL\_firstorder\_Kurtosis  
wavelet\_LHH\_glcm\_JointEnergy  
wavelet\_LHH\_gldm\_DependenceVariance  
wavelet\_HHH\_glszm\_GrayLevelNonUniformityNormalized  
wavelet\_LHH\_glrIm\_RunVariance  
wavelet\_LHH\_gldm\_LargeDependenceEmphasis  
wavelet\_LHH\_glcm\_MaximumProbability
