# Supplementary material for: Radiomic feature stability across 4D respiratory phases and its impact on lung tumor prognosis prediction
Source: PubMed Central journal article supplement (PMC6504105; doi:10.1371/journal.pone.0216480), 2019-05-07
Supplement: pone.0216480.s002.pdf [file pone.0216480.s002.pdf]

## Supplementary File 2: List of Radiomics features used with cutoffs of P-values, Q-values, and COV

### 1. Criterion: stable threshold is 5; Pval is 0.005; Qval is 0.04

#### Stable Features:

wavelet\_HHL\_glcm\_Id  
wavelet\_HLL\_grlm\_RunLengthNonUniformityNormalized  
wavelet\_HLH\_gldm\_DependenceNonUniformityNormalized

#### Full Features:

wavelet\_HHL\_glcm\_Id  
wavelet\_LLL\_glszm\_LargeAreaHighGrayLevelEmphasis  
original\_glszm\_LargeAreaHighGrayLevelEmphasis  
wavelet\_LLL\_glszm\_LargeAreaEmphasis  
wavelet\_HLL\_grlm\_RunLengthNonUniformityNormalized  
wavelet\_HLL\_glszm\_LargeAreaEmphasis  
wavelet\_LHL\_gldm\_GrayLevelNonUniformity  
wavelet\_HLH\_gldm\_DependenceNonUniformityNormalized

### 2. Criterion: stable threshold is 10; Pval is 0.005; Qval is 0.04

#### Stable Features:

wavelet\_HHL\_glcm\_Id  
wavelet\_HLL\_grlm\_RunLengthNonUniformityNormalized  
wavelet\_LHL\_gldm\_GrayLevelNonUniformity  
wavelet\_HLH\_gldm\_DependenceNonUniformityNormalized

#### Full Features:

wavelet\_HHL\_glcm\_Id  
wavelet\_LLL\_glszm\_LargeAreaHighGrayLevelEmphasis  
original\_glszm\_LargeAreaHighGrayLevelEmphasis  
wavelet\_LLL\_glszm\_LargeAreaEmphasis  
wavelet\_HLL\_grlm\_RunLengthNonUniformityNormalized  
wavelet\_HLL\_glszm\_LargeAreaEmphasis  
wavelet\_LHL\_gldm\_GrayLevelNonUniformity  
wavelet\_HLH\_gldm\_DependenceNonUniformityNormalized

### 3. Criterion: stable threshold is 15; Pval is 0.005; Qval is 0.04

#### Stable Features:

wavelet\_HHL\_glcm\_Id  
wavelet\_HLL\_grlm\_RunLengthNonUniformityNormalized  
wavelet\_LHL\_gldm\_GrayLevelNonUniformity  
wavelet\_HLH\_gldm\_DependenceNonUniformityNormalized

#### Full Features:

wavelet\_HHL\_glcm\_Id  
wavelet\_LLL\_glszm\_LargeAreaHighGrayLevelEmphasis  
original\_glszm\_LargeAreaHighGrayLevelEmphasis  
wavelet\_LLL\_glszm\_LargeAreaEmphasis  
wavelet\_HLL\_grlm\_RunLengthNonUniformityNormalized  
wavelet\_HLL\_glszm\_LargeAreaEmphasis  
wavelet\_LHL\_gldm\_GrayLevelNonUniformity  
wavelet\_HLH\_gldm\_DependenceNonUniformityNormalized

### 4. Criterion: stable threshold is 20; Pval is 0.005; Qval is 0.04

#### Stable Features:

wavelet\_HHL\_glcm\_Id  
wavelet\_LLL\_glszm\_LargeAreaEmphasis  
wavelet\_HLL\_glrlm\_RunLengthNonUniformityNormalized  
wavelet\_HLL\_glszm\_LargeAreaEmphasis  
wavelet\_LHL\_gldm\_GrayLevelNonUniformity  
wavelet\_HLH\_gldm\_DependenceNonUniformityNormalized

**Full Features:**

wavelet\_HHL\_glcm\_Id  
wavelet\_LLL\_glszm\_LargeAreaHighGrayLevelEmphasis  
original\_glszm\_LargeAreaHighGrayLevelEmphasis  
wavelet\_LLL\_glszm\_LargeAreaEmphasis  
wavelet\_HLL\_glrlm\_RunLengthNonUniformityNormalized  
wavelet\_HLL\_glszm\_LargeAreaEmphasis  
wavelet\_LHL\_gldm\_GrayLevelNonUniformity  
wavelet\_HLH\_gldm\_DependenceNonUniformityNormalized

**5. Criterion: stable threshold is 25; Pval is 0.005; Qval is 0.04**

**Stable Features:**

wavelet\_HHL\_glcm\_Id  
wavelet\_LLL\_glszm\_LargeAreaHighGrayLevelEmphasis  
original\_glszm\_LargeAreaHighGrayLevelEmphasis  
wavelet\_LLL\_glszm\_LargeAreaEmphasis  
wavelet\_HLL\_glrlm\_RunLengthNonUniformityNormalized  
wavelet\_HLL\_glszm\_LargeAreaEmphasis  
wavelet\_LHL\_gldm\_GrayLevelNonUniformity  
wavelet\_HLH\_gldm\_DependenceNonUniformityNormalized

**Full Features:**

wavelet\_HHL\_glcm\_Id  
wavelet\_LLL\_glszm\_LargeAreaHighGrayLevelEmphasis  
original\_glszm\_LargeAreaHighGrayLevelEmphasis  
wavelet\_LLL\_glszm\_LargeAreaEmphasis  
wavelet\_HLL\_glrlm\_RunLengthNonUniformityNormalized  
wavelet\_HLL\_glszm\_LargeAreaEmphasis  
wavelet\_LHL\_gldm\_GrayLevelNonUniformity  
wavelet\_HLH\_gldm\_DependenceNonUniformityNormalized

**6. Criterion: stable threshold is 5; Pval is 0.007; Qval is 0.045**

**Stable Features:**

wavelet\_HHL\_glcm\_Id  
wavelet\_HLL\_gldm\_DependenceNonUniformityNormalized

**Full Features:**

wavelet\_HHL\_glcm\_Id  
wavelet\_LLL\_glszm\_LargeAreaHighGrayLevelEmphasis  
original\_glszm\_LargeAreaHighGrayLevelEmphasis  
wavelet\_HLL\_gldm\_DependenceNonUniformityNormalized  
wavelet\_LLL\_glszm\_LargeAreaEmphasis  
wavelet\_HLL\_glszm\_LargeAreaEmphasis  
wavelet\_LHL\_gldm\_GrayLevelNonUniformity

**7. Criterion: stable threshold is 10; Pval is 0.007; Qval is 0.045**

**Stable Features:**

wavelet\_HHL\_glcm\_Id  
wavelet\_HLL\_gldm\_DependenceNonUniformityNormalized  
wavelet\_LHL\_gldm\_GrayLevelNonUniformity

**Full Features:**

wavelet\_HHL\_glcm\_Id  
wavelet\_LLL\_glszm\_LargeAreaHighGrayLevelEmphasis  
original\_glszm\_LargeAreaHighGrayLevelEmphasis  
wavelet\_HLL\_gldm\_DependenceNonUniformityNormalized  
wavelet\_LLL\_glszm\_LargeAreaEmphasis  
wavelet\_HLL\_glszm\_LargeAreaEmphasis  
wavelet\_LHL\_gldm\_GrayLevelNonUniformity

**8. Criterion: stable threshold is 15; Pval is 0.007; Qval is 0.045**

**Stable Features:**

wavelet\_HHL\_glcm\_Id  
wavelet\_HLL\_gldm\_DependenceNonUniformityNormalized  
wavelet\_LHL\_gldm\_GrayLevelNonUniformity

**Full Features:**

wavelet\_HHL\_glcm\_Id  
wavelet\_LLL\_glszm\_LargeAreaHighGrayLevelEmphasis  
original\_glszm\_LargeAreaHighGrayLevelEmphasis  
wavelet\_HLL\_gldm\_DependenceNonUniformityNormalized  
wavelet\_LLL\_glszm\_LargeAreaEmphasis  
wavelet\_HLL\_glszm\_LargeAreaEmphasis  
wavelet\_LHL\_gldm\_GrayLevelNonUniformity

**9. Criterion: stable threshold is 20; Pval is 0.007; Qval is 0.045**

**Stable Features:**

wavelet\_HHL\_glcm\_Id  
wavelet\_HLL\_gldm\_DependenceNonUniformityNormalized  
wavelet\_LLL\_glszm\_LargeAreaEmphasis  
wavelet\_HLL\_glszm\_LargeAreaEmphasis  
wavelet\_LHL\_gldm\_GrayLevelNonUniformity

**Full Features:**

wavelet\_HHL\_glcm\_Id  
wavelet\_LLL\_glszm\_LargeAreaHighGrayLevelEmphasis  
original\_glszm\_LargeAreaHighGrayLevelEmphasis  
wavelet\_HLL\_gldm\_DependenceNonUniformityNormalized  
wavelet\_LLL\_glszm\_LargeAreaEmphasis  
wavelet\_HLL\_glszm\_LargeAreaEmphasis  
wavelet\_LHL\_gldm\_GrayLevelNonUniformity

**10. Criterion: stable threshold is 25; Pval is 0.007; Qval is 0.045**

**Stable Features:**

wavelet\_HHL\_glcm\_Id  
wavelet\_LLL\_glszm\_LargeAreaHighGrayLevelEmphasis  
original\_glszm\_LargeAreaHighGrayLevelEmphasis  
wavelet\_HLL\_gldm\_DependenceNonUniformityNormalized  
wavelet\_LLL\_glszm\_LargeAreaEmphasis  
wavelet\_HLL\_glszm\_LargeAreaEmphasis  
wavelet\_LHL\_gldm\_GrayLevelNonUniformity

**Full Features:**

wavelet\_HHL\_glcm\_Id  
wavelet\_LLL\_glszm\_LargeAreaHighGrayLevelEmphasis  
original\_glszm\_LargeAreaHighGrayLevelEmphasis  
wavelet\_HLL\_gldm\_DependenceNonUniformityNormalized  
wavelet\_LLL\_glszm\_LargeAreaEmphasis

wavelet\_HLL\_glszm\_LargeAreaEmphasis  
wavelet\_LHL\_gldm\_GrayLevelNonUniformity

**11. Criterion: stable threshold is 5; Pval is 0.01; Qval is 0.05**

**Stable Features:**

wavelet\_HHL\_glcm\_Id  
wavelet\_HHH\_glcm\_DifferenceAverage  
wavelet\_HLL\_gldm\_DependenceNonUniformityNormalized

**Full Features:**

wavelet\_HHL\_glcm\_Id  
wavelet\_HHH\_glcm\_DifferenceAverage  
wavelet\_LLL\_glszm\_LargeAreaHighGrayLevelEmphasis  
original\_glszm\_LargeAreaHighGrayLevelEmphasis  
wavelet\_HLL\_gldm\_DependenceNonUniformityNormalized  
wavelet\_LLL\_glszm\_LargeAreaEmphasis  
wavelet\_HLL\_glszm\_LargeAreaEmphasis  
wavelet\_HLH\_gldm\_SmallDependenceEmphasis  
wavelet\_LHL\_gldm\_GrayLevelNonUniformity

**12. Criterion: stable threshold is 10; Pval is 0.01; Qval is 0.05**

**Stable Features:**

wavelet\_HHL\_glcm\_Id  
wavelet\_HHH\_glcm\_DifferenceAverage  
wavelet\_HLL\_gldm\_DependenceNonUniformityNormalized  
wavelet\_HLH\_gldm\_SmallDependenceEmphasis  
wavelet\_LHL\_gldm\_GrayLevelNonUniformity

**Full Features:**

wavelet\_HHL\_glcm\_Id  
wavelet\_HHH\_glcm\_DifferenceAverage  
wavelet\_LLL\_glszm\_LargeAreaHighGrayLevelEmphasis  
original\_glszm\_LargeAreaHighGrayLevelEmphasis  
wavelet\_HLL\_gldm\_DependenceNonUniformityNormalized  
wavelet\_LLL\_glszm\_LargeAreaEmphasis  
wavelet\_HLL\_glszm\_LargeAreaEmphasis  
wavelet\_HLH\_gldm\_SmallDependenceEmphasis  
wavelet\_LHL\_gldm\_GrayLevelNonUniformity

**13. Criterion: stable threshold is 15; Pval is 0.01; Qval is 0.05**

**Stable Features:**

wavelet\_HHL\_glcm\_Id  
wavelet\_HHH\_glcm\_DifferenceAverage  
wavelet\_HLL\_gldm\_DependenceNonUniformityNormalized  
wavelet\_HLH\_gldm\_SmallDependenceEmphasis  
wavelet\_LHL\_gldm\_GrayLevelNonUniformity

**Full Features:**

wavelet\_HHL\_glcm\_Id  
wavelet\_HHH\_glcm\_DifferenceAverage  
wavelet\_LLL\_glszm\_LargeAreaHighGrayLevelEmphasis  
original\_glszm\_LargeAreaHighGrayLevelEmphasis  
wavelet\_HLL\_gldm\_DependenceNonUniformityNormalized  
wavelet\_LLL\_glszm\_LargeAreaEmphasis  
wavelet\_HLL\_glszm\_LargeAreaEmphasis  
wavelet\_HLH\_gldm\_SmallDependenceEmphasis  
wavelet\_LHL\_gldm\_GrayLevelNonUniformity

**14. Criterion: stable threshold is 20; Pval is 0.01; Qval is 0.05**

**Stable Features:**

wavelet\_HHL\_glcm\_Id  
wavelet\_HHH\_glcm\_DifferenceAverage  
wavelet\_HLL\_gldm\_DependenceNonUniformityNormalized  
wavelet\_LLL\_glszm\_LargeAreaEmphasis  
wavelet\_HLL\_glszm\_LargeAreaEmphasis  
wavelet\_HLH\_gldm\_SmallDependenceEmphasis  
wavelet\_LHL\_gldm\_GrayLevelNonUniformity

**Full Features:**

wavelet\_HHL\_glcm\_Id  
wavelet\_HHH\_glcm\_DifferenceAverage  
wavelet\_LLL\_glszm\_LargeAreaHighGrayLevelEmphasis  
original\_glszm\_LargeAreaHighGrayLevelEmphasis  
wavelet\_HLL\_gldm\_DependenceNonUniformityNormalized  
wavelet\_LLL\_glszm\_LargeAreaEmphasis  
wavelet\_HLL\_glszm\_LargeAreaEmphasis  
wavelet\_HLH\_gldm\_SmallDependenceEmphasis  
wavelet\_LHL\_gldm\_GrayLevelNonUniformity

**15. Criterion: stable threshold is 25; Pval is 0.01; Qval is 0.05**

**Stable Features:**

wavelet\_HHL\_glcm\_Id  
wavelet\_HHH\_glcm\_DifferenceAverage  
wavelet\_LLL\_glszm\_LargeAreaHighGrayLevelEmphasis  
original\_glszm\_LargeAreaHighGrayLevelEmphasis  
wavelet\_HLL\_gldm\_DependenceNonUniformityNormalized  
wavelet\_LLL\_glszm\_LargeAreaEmphasis  
wavelet\_HLL\_glszm\_LargeAreaEmphasis  
wavelet\_HLH\_gldm\_SmallDependenceEmphasis  
wavelet\_LHL\_gldm\_GrayLevelNonUniformity

**Full Features:**

wavelet\_HHL\_glcm\_Id  
wavelet\_HHH\_glcm\_DifferenceAverage  
wavelet\_LLL\_glszm\_LargeAreaHighGrayLevelEmphasis  
original\_glszm\_LargeAreaHighGrayLevelEmphasis  
wavelet\_HLL\_gldm\_DependenceNonUniformityNormalized  
wavelet\_LLL\_glszm\_LargeAreaEmphasis  
wavelet\_HLL\_glszm\_LargeAreaEmphasis  
wavelet\_HLH\_gldm\_SmallDependenceEmphasis  
wavelet\_LHL\_gldm\_GrayLevelNonUniformity

**16. Criterion: stable threshold is 5; Pval is 0.03; Qval is 0.07**

**Stable Features:**

wavelet\_HHL\_glcm\_Id  
wavelet\_HHH\_glcm\_DifferenceAverage  
wavelet\_HLL\_glcm\_DifferenceEntropy  
original\_glrIm\_LongRunEmphasis  
wavelet\_LLH\_firstorder\_Entropy  
wavelet\_LLH\_glcm\_Idmn  
wavelet\_LLH\_glszm\_SmallAreaEmphasis  
original\_glcm\_Imc2

wavelet\_HLH\_gldm\_DependenceNonUniformityNormalized  
original\_firstorder\_10Percentile

**Full Features:**

wavelet\_HHL\_glcm\_Id  
wavelet\_HHH\_glrIm\_GrayLevelVariance  
wavelet\_LLH\_glrIm\_RunVariance  
wavelet\_HLL\_glcm\_DifferenceEntropy  
wavelet\_LLL\_glszm\_LargeAreaHighGrayLevelEmphasis  
original\_glszm\_LargeAreaHighGrayLevelEmphasis  
wavelet\_LLH\_firstorder\_Entropy  
wavelet\_LLH\_glcm\_Idmn  
wavelet\_LLL\_glszm\_LargeAreaEmphasis  
wavelet\_HLH\_glszm\_ZonePercentage  
wavelet\_LLH\_glszm\_SmallAreaEmphasis  
wavelet\_HHH\_firstorder\_Median  
wavelet\_HLL\_glszm\_LargeAreaEmphasis  
wavelet\_LLH\_glszm\_ZoneVariance  
wavelet\_HHL\_glszm\_ZoneVariance  
original\_glcm\_Imc2  
wavelet\_HLH\_glszm\_LargeAreaHighGrayLevelEmphasis  
original\_firstorder\_10Percentile  
wavelet\_HLL\_firstorder\_Kurtosis  
wavelet\_LLH\_glszm\_LargeAreaHighGrayLevelEmphasis

**17. Criterion: stable threshold is 10; Pval is 0.03; Qval is 0.07**

**Stable Features:**

wavelet\_HHL\_glcm\_Id  
wavelet\_HHH\_glrIm\_GrayLevelVariance  
wavelet\_LLH\_glrIm\_RunVariance  
wavelet\_HLL\_glcm\_DifferenceEntropy  
wavelet\_LLH\_firstorder\_Entropy  
wavelet\_LLH\_glcm\_Idmn  
wavelet\_HLH\_glszm\_ZonePercentage  
wavelet\_LLH\_glszm\_SmallAreaEmphasis  
original\_glcm\_Imc2  
wavelet\_LHL\_gldm\_GrayLevelNonUniformity  
original\_firstorder\_10Percentile  
wavelet\_HLL\_firstorder\_Kurtosis

**Full Features:**

wavelet\_HHL\_glcm\_Id  
wavelet\_HHH\_glrIm\_GrayLevelVariance  
wavelet\_LLH\_glrIm\_RunVariance  
wavelet\_HLL\_glcm\_DifferenceEntropy  
wavelet\_LLL\_glszm\_LargeAreaHighGrayLevelEmphasis  
original\_glszm\_LargeAreaHighGrayLevelEmphasis  
wavelet\_LLH\_firstorder\_Entropy  
wavelet\_LLH\_glcm\_Idmn  
wavelet\_LLL\_glszm\_LargeAreaEmphasis  
wavelet\_HLH\_glszm\_ZonePercentage  
wavelet\_LLH\_glszm\_SmallAreaEmphasis  
wavelet\_HHH\_firstorder\_Median  
wavelet\_HLL\_glszm\_LargeAreaEmphasis

wavelet\_LLH\_glszm\_ZoneVariance  
wavelet\_HHL\_glszm\_ZoneVariance  
original\_glcm\_Imc2  
wavelet\_HLH\_glszm\_LargeAreaHighGrayLevelEmphasis  
original\_firstorder\_10Percentile  
wavelet\_HLL\_firstorder\_Kurtosis  
wavelet\_LLH\_glszm\_LargeAreaHighGrayLevelEmphasis  
**18. Criterion: stable threshold is 15; Pval is 0.03; Qval is 0.07**  
**Stable Features:**

wavelet\_HHL\_glcm\_Id  
wavelet\_HHH\_glrIm\_GrayLevelVariance  
wavelet\_LLH\_glrIm\_RunVariance  
wavelet\_HLL\_glcm\_DifferenceEntropy  
wavelet\_LLH\_firstorder\_Entropy  
wavelet\_LLH\_glcm\_Idmn  
wavelet\_HLH\_glszm\_ZonePercentage  
wavelet\_LLH\_glszm\_SmallAreaEmphasis  
original\_glcm\_Imc2  
wavelet\_LHL\_gldm\_GrayLevelNonUniformity  
original\_firstorder\_10Percentile  
wavelet\_HLL\_firstorder\_Kurtosis

**Full Features:**

wavelet\_HHL\_glcm\_Id  
wavelet\_HHH\_glrIm\_GrayLevelVariance  
wavelet\_LLH\_glrIm\_RunVariance  
wavelet\_HLL\_glcm\_DifferenceEntropy  
wavelet\_LLL\_glszm\_LargeAreaHighGrayLevelEmphasis  
original\_glszm\_LargeAreaHighGrayLevelEmphasis  
wavelet\_LLH\_firstorder\_Entropy  
wavelet\_LLH\_glcm\_Idmn  
wavelet\_LLL\_glszm\_LargeAreaEmphasis  
wavelet\_HLH\_glszm\_ZonePercentage  
wavelet\_LLH\_glszm\_SmallAreaEmphasis  
wavelet\_HHH\_firstorder\_Median  
wavelet\_HLL\_glszm\_LargeAreaEmphasis  
wavelet\_LLH\_glszm\_ZoneVariance  
wavelet\_HHL\_glszm\_ZoneVariance  
original\_glcm\_Imc2  
wavelet\_HLH\_glszm\_LargeAreaHighGrayLevelEmphasis  
original\_firstorder\_10Percentile  
wavelet\_HLL\_firstorder\_Kurtosis  
wavelet\_LLH\_glszm\_LargeAreaHighGrayLevelEmphasis  
**19. Criterion: stable threshold is 20; Pval is 0.03; Qval is 0.07**

**Stable Features:**

wavelet\_HHL\_glcm\_Id  
wavelet\_HHH\_glrIm\_GrayLevelVariance  
wavelet\_LLH\_glrIm\_RunVariance  
wavelet\_HLL\_glcm\_DifferenceEntropy  
wavelet\_LLH\_firstorder\_Entropy  
wavelet\_LLH\_glcm\_Idmn  
wavelet\_LLL\_glszm\_LargeAreaEmphasis

wavelet\_HLH\_glszm\_ZonePercentage  
wavelet\_LLH\_glszm\_SmallAreaEmphasis  
wavelet\_HLL\_glszm\_LargeAreaEmphasis  
wavelet\_LLH\_glszm\_ZoneVariance  
wavelet\_HHL\_glszm\_ZoneVariance  
original\_glcm\_Imc2  
original\_firstorder\_10Percentile  
wavelet\_HLL\_firstorder\_Kurtosis

**Full Features:**

wavelet\_HHL\_glcm\_Id  
wavelet\_HHH\_glrIm\_GrayLevelVariance  
wavelet\_LLH\_glrIm\_RunVariance  
wavelet\_HLL\_glcm\_DifferenceEntropy  
wavelet\_LLL\_glszm\_LargeAreaHighGrayLevelEmphasis  
original\_glszm\_LargeAreaHighGrayLevelEmphasis  
wavelet\_LLH\_firstorder\_Entropy  
wavelet\_LLH\_glcm\_Idmn  
wavelet\_LLL\_glszm\_LargeAreaEmphasis  
wavelet\_HLH\_glszm\_ZonePercentage  
wavelet\_LLH\_glszm\_SmallAreaEmphasis  
wavelet\_HHH\_firstorder\_Median  
wavelet\_HLL\_glszm\_LargeAreaEmphasis  
wavelet\_LLH\_glszm\_ZoneVariance  
wavelet\_HHL\_glszm\_ZoneVariance  
original\_glcm\_Imc2  
wavelet\_HLH\_glszm\_LargeAreaHighGrayLevelEmphasis  
original\_firstorder\_10Percentile  
wavelet\_HLL\_firstorder\_Kurtosis  
wavelet\_LLH\_glszm\_LargeAreaHighGrayLevelEmphasis  
**20. Criterion: stable threshold is 25; Pval is 0.03; Qval is 0.07**

**Stable Features:**

wavelet\_HHL\_glcm\_Id  
wavelet\_HHH\_glrIm\_GrayLevelVariance  
wavelet\_LLH\_glrIm\_RunVariance  
wavelet\_HLL\_glcm\_DifferenceEntropy  
wavelet\_LLL\_glszm\_LargeAreaHighGrayLevelEmphasis  
original\_glszm\_LargeAreaHighGrayLevelEmphasis  
wavelet\_LLH\_firstorder\_Entropy  
wavelet\_LLH\_glcm\_Idmn  
wavelet\_LLL\_glszm\_LargeAreaEmphasis  
wavelet\_HLH\_glszm\_ZonePercentage  
wavelet\_LLH\_glszm\_SmallAreaEmphasis  
wavelet\_HLL\_glszm\_LargeAreaEmphasis  
wavelet\_LLH\_glszm\_ZoneVariance  
wavelet\_HHL\_glszm\_ZoneVariance  
original\_glcm\_Imc2  
original\_firstorder\_10Percentile  
wavelet\_HLL\_firstorder\_Kurtosis  
wavelet\_LLH\_glszm\_LargeAreaHighGrayLevelEmphasis

**Full Features:**

wavelet\_HHL\_glcm\_Id



wavelet\_HHH\_glrIm\_GrayLevelVariance  
wavelet\_LLH\_glrIm\_RunVariance  
wavelet\_HLL\_glcm\_DifferenceEntropy  
wavelet\_LLL\_glszm\_LargeAreaHighGrayLevelEmphasis  
original\_glszm\_LargeAreaHighGrayLevelEmphasis  
wavelet\_LLH\_firstorder\_Entropy  
wavelet\_LLH\_glcm\_Idmn  
wavelet\_LLL\_glszm\_LargeAreaEmphasis  
wavelet\_HLH\_glszm\_ZonePercentage  
wavelet\_LLH\_glszm\_SmallAreaEmphasis  
wavelet\_HHH\_firstorder\_Median  
wavelet\_HLL\_glszm\_LargeAreaEmphasis  
wavelet\_LLH\_glszm\_ZoneVariance  
wavelet\_HHL\_glszm\_ZoneVariance  
original\_glcm\_Imc2  
wavelet\_HLH\_glszm\_LargeAreaHighGrayLevelEmphasis  
original\_firstorder\_10Percentile  
wavelet\_HLL\_firstorder\_Kurtosis  
wavelet\_LLH\_glszm\_LargeAreaHighGrayLevelEmphasis  
**21. Criterion: stable threshold is 5; Pval is 0.05; Qval is 0.09**

**Stable Features:**

wavelet\_HHL\_glcm\_Id  
wavelet\_HHH\_gldm\_DependenceEntropy  
wavelet\_HLL\_glcm\_DifferenceEntropy  
wavelet\_LLH\_firstorder\_RootMeanSquared  
original\_glrIm\_LongRunEmphasis  
wavelet\_LLH\_glcm\_Idmn  
wavelet\_LLH\_glszm\_SmallAreaEmphasis  
original\_glcm\_Imc2  
wavelet\_HLH\_gldm\_DependenceNonUniformityNormalized  
wavelet\_HLL\_glcm\_Idn  
wavelet\_LLL\_firstorder\_Entropy

**Full Features:**

wavelet\_HHL\_glcm\_Id  
wavelet\_HHH\_glrIm\_GrayLevelVariance  
wavelet\_LLH\_glrIm\_RunVariance  
wavelet\_HLL\_glcm\_DifferenceEntropy  
wavelet\_LLL\_glszm\_LargeAreaHighGrayLevelEmphasis  
wavelet\_LLL\_firstorder\_Skewness  
original\_glszm\_LargeAreaHighGrayLevelEmphasis  
wavelet\_LLH\_firstorder\_RootMeanSquared  
wavelet\_LLH\_glcm\_Idmn  
wavelet\_LLL\_glszm\_LargeAreaEmphasis  
wavelet\_HLH\_glszm\_ZonePercentage  
wavelet\_HLH\_glszm\_SizeZoneNonUniformityNormalized  
wavelet\_LLH\_glszm\_SmallAreaEmphasis  
wavelet\_HLH\_glcm\_JointAverage  
wavelet\_HHL\_glcm\_ClusterProminence  
wavelet\_HHL\_ngtdm\_Contrast  
wavelet\_HHH\_firstorder\_Median  
wavelet\_HLL\_glszm\_LargeAreaEmphasis

wavelet\_HLL\_ngtdm\_Contrast  
wavelet\_LLH\_glszm\_ZoneVariance  
original\_firstorder\_MeanAbsoluteDeviation  
wavelet\_HHL\_glszm\_ZoneVariance  
original\_glcm\_Imc2  
original\_firstorder\_Maximum  
wavelet\_HLH\_glszm\_LargeAreaHighGrayLevelEmphasis  
wavelet\_HLL\_firstorder\_Kurtosis  
wavelet\_LLH\_glszm\_LargeAreaHighGrayLevelEmphasis  
**22. Criterion: stable threshold is 10; Pval is 0.05; Qval is 0.09**

**Stable Features:**

wavelet\_HHL\_glcm\_Id  
wavelet\_HHH\_glrIm\_GrayLevelVariance  
wavelet\_LLH\_glrIm\_RunVariance  
wavelet\_HLL\_glcm\_DifferenceEntropy  
wavelet\_LLH\_firstorder\_RootMeanSquared  
wavelet\_LLH\_glcm\_Idmn  
wavelet\_HLH\_glszm\_ZonePercentage  
wavelet\_HLH\_glszm\_SizeZoneNonUniformityNormalized  
wavelet\_LLH\_glszm\_SmallAreaEmphasis  
original\_firstorder\_MeanAbsoluteDeviation  
wavelet\_LLL\_gldm\_GrayLevelNonUniformity  
original\_glcm\_Imc2  
wavelet\_LHL\_gldm\_GrayLevelNonUniformity  
wavelet\_HLL\_glcm\_Idn

**Full Features:**

wavelet\_HHL\_glcm\_Id  
wavelet\_HHH\_glrIm\_GrayLevelVariance  
wavelet\_LLH\_glrIm\_RunVariance  
wavelet\_HLL\_glcm\_DifferenceEntropy  
wavelet\_LLL\_glszm\_LargeAreaHighGrayLevelEmphasis  
wavelet\_LLL\_firstorder\_Skewness  
original\_glszm\_LargeAreaHighGrayLevelEmphasis  
wavelet\_LLH\_firstorder\_RootMeanSquared  
wavelet\_LLH\_glcm\_Idmn  
wavelet\_LLL\_glszm\_LargeAreaEmphasis  
wavelet\_HLH\_glszm\_ZonePercentage  
wavelet\_HLH\_glszm\_SizeZoneNonUniformityNormalized  
wavelet\_LLH\_glszm\_SmallAreaEmphasis  
wavelet\_HLH\_glcm\_JointAverage  
wavelet\_HHL\_glcm\_ClusterProminence  
wavelet\_HHL\_ngtdm\_Contrast  
wavelet\_HHH\_firstorder\_Median  
wavelet\_HLL\_glszm\_LargeAreaEmphasis  
wavelet\_HLL\_ngtdm\_Contrast  
wavelet\_LLH\_glszm\_ZoneVariance  
original\_firstorder\_MeanAbsoluteDeviation  
wavelet\_HHL\_glszm\_ZoneVariance  
original\_glcm\_Imc2  
original\_firstorder\_Maximum  
wavelet\_HLH\_glszm\_LargeAreaHighGrayLevelEmphasis

wavelet\_HLL\_firstorder\_Kurtosis  
wavelet\_LLH\_glszm\_LargeAreaHighGrayLevelEmphasis  
**23. Criterion: stable threshold is 15; Pval is 0.05; Qval is 0.09**

**Stable Features:**

wavelet\_HHL\_glcm\_Id  
wavelet\_HHH\_glrIm\_GrayLevelVariance  
wavelet\_LLH\_glrIm\_RunVariance  
wavelet\_HLL\_glcm\_DifferenceEntropy  
wavelet\_LLH\_firstorder\_RootMeanSquared  
wavelet\_LLH\_glcm\_Idmn  
wavelet\_HLH\_glszm\_ZonePercentage  
wavelet\_HLH\_glszm\_SizeZoneNonUniformityNormalized  
wavelet\_LLH\_glszm\_SmallAreaEmphasis  
wavelet\_HLH\_glcm\_JointAverage  
wavelet\_HHL\_ngtdm\_Contrast  
wavelet\_HLL\_ngtdm\_Contrast  
original\_firstorder\_MeanAbsoluteDeviation  
wavelet\_LLL\_gldm\_GrayLevelNonUniformity  
original\_glcm\_Imc2  
wavelet\_LHL\_gldm\_GrayLevelNonUniformity  
wavelet\_HLL\_firstorder\_Kurtosis

**Full Features:**

wavelet\_HHL\_glcm\_Id  
wavelet\_HHH\_glrIm\_GrayLevelVariance  
wavelet\_LLH\_glrIm\_RunVariance  
wavelet\_HLL\_glcm\_DifferenceEntropy  
wavelet\_LLL\_glszm\_LargeAreaHighGrayLevelEmphasis  
wavelet\_LLL\_firstorder\_Skewness  
original\_glszm\_LargeAreaHighGrayLevelEmphasis  
wavelet\_LLH\_firstorder\_RootMeanSquared  
wavelet\_LLH\_glcm\_Idmn  
wavelet\_LLL\_glszm\_LargeAreaEmphasis  
wavelet\_HLH\_glszm\_ZonePercentage  
wavelet\_HLH\_glszm\_SizeZoneNonUniformityNormalized  
wavelet\_LLH\_glszm\_SmallAreaEmphasis  
wavelet\_HLH\_glcm\_JointAverage  
wavelet\_HHL\_glcm\_ClusterProminence  
wavelet\_HHL\_ngtdm\_Contrast  
wavelet\_HHH\_firstorder\_Median  
wavelet\_HLL\_glszm\_LargeAreaEmphasis  
wavelet\_HLL\_ngtdm\_Contrast  
wavelet\_LLH\_glszm\_ZoneVariance  
original\_firstorder\_MeanAbsoluteDeviation  
wavelet\_HHL\_glszm\_ZoneVariance  
original\_glcm\_Imc2  
original\_firstorder\_Maximum  
wavelet\_HLH\_glszm\_LargeAreaHighGrayLevelEmphasis  
wavelet\_HLL\_firstorder\_Kurtosis  
wavelet\_LLH\_glszm\_LargeAreaHighGrayLevelEmphasis  
**24. Criterion: stable threshold is 20; Pval is 0.05; Qval is 0.09**

**Stable Features:**

wavelet\_HHL\_glcm\_Id  
wavelet\_HHH\_glrIm\_GrayLevelVariance  
wavelet\_LLH\_glrIm\_RunVariance  
wavelet\_HLL\_glcm\_DifferenceEntropy  
wavelet\_LLH\_firstorder\_RootMeanSquared  
wavelet\_LLH\_glcm\_Idmn  
wavelet\_LLL\_glszm\_LargeAreaEmphasis  
wavelet\_HLH\_glszm\_ZonePercentage  
wavelet\_HLH\_glszm\_SizeZoneNonUniformityNormalized  
wavelet\_LLH\_glszm\_SmallAreaEmphasis  
wavelet\_HLH\_glcm\_JointAverage  
wavelet\_HHL\_glcm\_ClusterProminence  
wavelet\_HHL\_ngtdm\_Contrast  
wavelet\_HLL\_glszm\_LargeAreaEmphasis  
wavelet\_HLL\_ngtdm\_Contrast  
wavelet\_LLH\_glszm\_ZoneVariance  
original\_firstorder\_MeanAbsoluteDeviation  
wavelet\_HHL\_glszm\_ZoneVariance  
original\_glcm\_Imc2  
wavelet\_HLL\_firstorder\_Kurtosis

**Full Features:**

wavelet\_HHL\_glcm\_Id  
wavelet\_HHH\_glrIm\_GrayLevelVariance  
wavelet\_LLH\_glrIm\_RunVariance  
wavelet\_HLL\_glcm\_DifferenceEntropy  
wavelet\_LLL\_glszm\_LargeAreaHighGrayLevelEmphasis  
wavelet\_LLL\_firstorder\_Skewness  
original\_glszm\_LargeAreaHighGrayLevelEmphasis  
wavelet\_LLH\_firstorder\_RootMeanSquared  
wavelet\_LLH\_glcm\_Idmn  
wavelet\_LLL\_glszm\_LargeAreaEmphasis  
wavelet\_HLH\_glszm\_ZonePercentage  
wavelet\_HLH\_glszm\_SizeZoneNonUniformityNormalized  
wavelet\_LLH\_glszm\_SmallAreaEmphasis  
wavelet\_HLH\_glcm\_JointAverage  
wavelet\_HHL\_glcm\_ClusterProminence  
wavelet\_HHL\_ngtdm\_Contrast  
wavelet\_HHH\_firstorder\_Median  
wavelet\_HLL\_glszm\_LargeAreaEmphasis  
wavelet\_HLL\_ngtdm\_Contrast  
wavelet\_LLH\_glszm\_ZoneVariance  
original\_firstorder\_MeanAbsoluteDeviation  
wavelet\_HHL\_glszm\_ZoneVariance  
original\_glcm\_Imc2  
original\_firstorder\_Maximum  
wavelet\_HLH\_glszm\_LargeAreaHighGrayLevelEmphasis  
wavelet\_HLL\_firstorder\_Kurtosis  
wavelet\_LLH\_glszm\_LargeAreaHighGrayLevelEmphasis

**25. Criterion: stable threshold is 25; Pval is 0.05; Qval is 0.09**

**Stable Features:**

wavelet\_HHL\_glcm\_Id  
wavelet\_HHH\_glrIm\_GrayLevelVariance  
wavelet\_LLH\_glrIm\_RunVariance  
wavelet\_HLL\_glcm\_DifferenceEntropy  
wavelet\_LLL\_glszm\_LargeAreaHighGrayLevelEmphasis  
wavelet\_LLL\_firstorder\_Skewness  
original\_glszm\_LargeAreaHighGrayLevelEmphasis  
wavelet\_LLH\_firstorder\_RootMeanSquared  
wavelet\_LLH\_glcm\_Idmn  
wavelet\_LLL\_glszm\_LargeAreaEmphasis  
wavelet\_HLH\_glszm\_ZonePercentage  
wavelet\_HLH\_glszm\_SizeZoneNonUniformityNormalized  
wavelet\_LLH\_glszm\_SmallAreaEmphasis  
wavelet\_HLH\_glcm\_JointAverage  
wavelet\_HHL\_glcm\_ClusterProminence  
wavelet\_HHL\_ngtdm\_Contrast  
wavelet\_HLL\_glszm\_LargeAreaEmphasis  
wavelet\_HLL\_ngtdm\_Contrast  
wavelet\_LLH\_glszm\_ZoneVariance  
original\_firstorder\_MeanAbsoluteDeviation  
wavelet\_HHL\_glszm\_ZoneVariance  
original\_glcm\_Imc2  
wavelet\_HLL\_firstorder\_Kurtosis  
wavelet\_LLH\_glszm\_LargeAreaHighGrayLevelEmphasis

**Full Features:**

wavelet\_HHL\_glcm\_Id  
wavelet\_HHH\_glrIm\_GrayLevelVariance  
wavelet\_LLH\_glrIm\_RunVariance  
wavelet\_HLL\_glcm\_DifferenceEntropy  
wavelet\_LLL\_glszm\_LargeAreaHighGrayLevelEmphasis  
wavelet\_LLL\_firstorder\_Skewness  
original\_glszm\_LargeAreaHighGrayLevelEmphasis  
wavelet\_LLH\_firstorder\_RootMeanSquared  
wavelet\_LLH\_glcm\_Idmn  
wavelet\_LLL\_glszm\_LargeAreaEmphasis  
wavelet\_HLH\_glszm\_ZonePercentage  
wavelet\_HLH\_glszm\_SizeZoneNonUniformityNormalized  
wavelet\_LLH\_glszm\_SmallAreaEmphasis  
wavelet\_HLH\_glcm\_JointAverage  
wavelet\_HHL\_glcm\_ClusterProminence  
wavelet\_HHL\_ngtdm\_Contrast  
wavelet\_HHH\_firstorder\_Median  
wavelet\_HLL\_glszm\_LargeAreaEmphasis  
wavelet\_HLL\_ngtdm\_Contrast  
wavelet\_LLH\_glszm\_ZoneVariance  
original\_firstorder\_MeanAbsoluteDeviation  
wavelet\_HHL\_glszm\_ZoneVariance  
original\_glcm\_Imc2  
original\_firstorder\_Maximum  
wavelet\_HLH\_glszm\_LargeAreaHighGrayLevelEmphasis

wavelet\_HLL\_firstorder\_Kurtosis  
wavelet\_LLH\_glszm\_LargeAreaHighGrayLevelEmphasis
